# Supplementary material for: Somatostatin-Mediated Regulation of Retinoic Acid-Induced Differentiation of SH-SY5Y Cells: Neurotransmitters Phenotype Characterization
Source: MDPI journal article supplement (doi:10.3390/biomedicines10020337), 2022-02-01
Supplement: s1 [file s1]

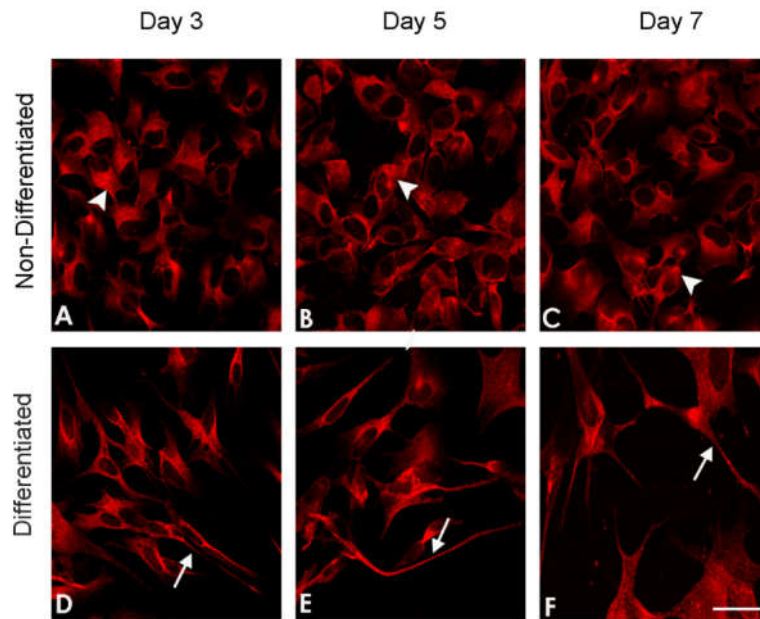

**Figure S1:** Representative photomicrographs illustrating GABA immunoreactivity in undifferentiated and differentiated SH-SY5Y cells. In undifferentiated SH-SY5Y cells (**A-C**), GABA expression was confined intracellularly (arrowhead) with increased staining on day 5 (**B**). In the presence of RA, the expression of GABA reduced in the cell body and strong immunoreactivity was seen in apical endings and neurites (arrow) till day 5 of differentiation (**D and E**). GABA-like immunoreactivity in neurites and intracellularly was reduced on day 7 with RA treatment (**F**). Scale bar = 20 $\mu$ m.

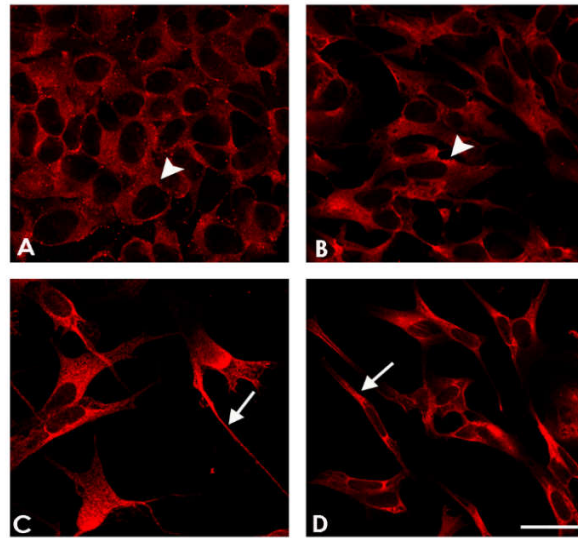

**Figure S2:** GABA expression in SH-SY5Y cells is regulated by SST. GABA-like immunoreactivity was well expressed in the cell body of control (A), and SST (B) treated cells (arrowhead). GABA-like immunoreactivity moved towards neurites formation (arrow) in cells treated with RA alone (C) or in combination with SST (D). Note: Immunoreactivity of GABA was reduced in cells treated with SST+RA compared to RA alone. Scale bar = 20 $\mu$ m.
